# Supplementary material for: IBTK Haploinsufficiency Affects the Tumor Microenvironment of Myc-Driven Lymphoma in E-myc Mice
Source: PubMed Central journal article supplement (PMC7038122; doi:10.3390/ijms21030885), 2020-01-30
Supplement: ijms-21-00885-s001.pdf [file ijms-21-00885-s001.pdf]

**Table S1.** Gene expression of pro-angiogenic factors in tumor lymph nodes of *Ibtk<sup>+/+</sup>E $\mu$ -myc* and *Ibtk<sup>+/+</sup>E $\mu$ -myc* mice.

| Symbol  | Gene                                                                                                           | Fold change | p-value      |
|---------|----------------------------------------------------------------------------------------------------------------|-------------|--------------|
| Akt1    | Thymoma viral proto-oncogene 1                                                                                 | 1,8967      | 0,007<br>061 |
| Ang     | Angiogenin, ribonuclease, RNase A family, 5                                                                    | 1,1159      | 0,929<br>481 |
| Angpt1  | Angiopoietin 1                                                                                                 | 4,3916      | 0,000<br>117 |
| Angpt2  | Angiopoietin 2                                                                                                 | 0,7478      | 0,461<br>625 |
| Anpep   | Alanyl (membrane) aminopeptidase                                                                               | 1,1015      | 0,258<br>737 |
| Bai1    | Brain-specific angiogenesis inhibitor 1                                                                        | 4,0927      | 0,000<br>202 |
| Ccl11   | Chemokine (C-C motif) ligand 11                                                                                | 3,1381      | 0,001<br>149 |
| Ccl2    | Chemokine (C-C motif) ligand 2                                                                                 | 2,8407      | 0,000<br>298 |
| Cdh5    | Cadherin 5                                                                                                     | 2,5849      | 0,000<br>744 |
| Col18a1 | Collagen, type XVIII, alpha 1                                                                                  | 3,8568      | 0,000<br>388 |
| Col4a3  | Collagen, type IV, alpha 3                                                                                     | 2,9031      | 0,003<br>327 |
| Csf3    | Colony stimulating factor 3 (granulocyte)                                                                      | 4,3332      | 0,000<br>258 |
| Ctgf    | Connective tissue growth factor                                                                                | 1,0195      | 0,693<br>88  |
| Cxcl1   | Chemokine (C-X-C motif) ligand 1                                                                               | 2,67        | 0,000<br>21  |
| Cxcl2   | Chemokine (C-X-C motif) ligand 2                                                                               | 0,7507      | 0,067<br>631 |
| Cxcl5   | Chemokine (C-X-C motif) ligand 5                                                                               | 3,921       | 0,000<br>328 |
| Edn1    | Endothelin 1                                                                                                   | 3,9931      | 0,000<br>042 |
| Efna1   | Ephrin A1                                                                                                      | 1,6449      | 0,001<br>601 |
| Efnb2   | Ephrin B2                                                                                                      | 2,8858      | 0,002<br>042 |
| Egf     | Epidermal growth factor                                                                                        | 1,726       | 0,000<br>51  |
| Eng     | Endoglin                                                                                                       | 0,2309      | 0,000<br>467 |
| Epas1   | Endothelial PAS domain protein 1                                                                               | 2,8421      | 0,000<br>764 |
| Ephb4   | Eph receptor B4                                                                                                | 3,6334      | 0,000<br>035 |
| ErbB2   | V-erb-b2 erythroblastic leukemia viral oncogene homolog 2, neuro/glioblastoma derived oncogene homolog (avian) | 3,9377      | 0,000<br>024 |
| F2      | Coagulation factor II                                                                                          | 3,8295      | 0,000<br>239 |

|        |                                                |        |              |
|--------|------------------------------------------------|--------|--------------|
| F3     | Coagulation factor III                         | 4,4195 | 0,000<br>293 |
| Fgf1   | Fibroblast growth factor 1                     | 2,8198 | 0,002<br>748 |
| Fgf2   | Fibroblast growth factor 2                     | 3,4341 | 0,000<br>711 |
| Fgf6   | Fibroblast growth factor 6                     | 3,5819 | 0,000<br>099 |
| Fgfr3  | Fibroblast growth factor receptor 3            | 3,6971 | 0,000<br>494 |
| Fn1    | Fibronectin 1                                  | 1,6387 | 0,000<br>983 |
| Hgf    | Hepatocyte growth factor                       | 3,2145 | 0,000<br>011 |
| Hif1a  | Hypoxia inducible factor 1, alpha subunit      | 1,0027 | 0,919<br>779 |
| Ifng   | Interferon gamma                               | 1,8132 | 0,003<br>184 |
| Igf1   | Insulin-like growth factor 1                   | 2,0136 | 0,002<br>075 |
| Il1b   | Interleukin 1 beta                             | 1,8431 | 0,005<br>453 |
| Il6    | Interleukin 6                                  | 4,5217 | 0,000<br>156 |
| Itgav  | Integrin alpha V                               | 0,9934 | 0,954<br>852 |
| Itgb3  | Integrin beta 3                                | 2,6289 | 0,000<br>337 |
| Jag1   | Jagged 1                                       | 2,9588 | 0,000<br>181 |
| Kdr    | Kinase insert domain protein receptor          | 2,8562 | 0,000<br>562 |
| Lect1  | Leukocyte cell derived chemotaxin 1            | 3,3089 | 0,000<br>182 |
| Lep    | Leptin                                         | 3,6998 | 0,000<br>295 |
| Mapk14 | Mitogen-activated protein kinase 14            | 1,0552 | 0,584<br>574 |
| Mdk    | Midkine                                        | 1,4593 | 0,008<br>314 |
| Mmp14  | Matrix metallopeptidase 14 (membrane-inserted) | 0,4875 | 0,003<br>369 |
| Mmp 9  | Matrix metallopeptidase 9                      | 2,6197 | 0,000<br>467 |
| Mmp2   | Matrix metallopeptidase 2                      | 2,3353 | 0,000<br>265 |
| Mmp 19 | Matrix metallopeptidase 19                     | 1,2039 | 0,051<br>209 |
| Nos3   | Nitric oxide synthase 3, endothelial cell      | 4,8217 | 0,000<br>148 |
| Nrp1   | Neuropilin 1                                   | 1,8741 | 0,000<br>112 |
| Nrp2   | Neuropilin 2                                   | 0,3616 | 0,000<br>624 |
| Pdgfa  | Platelet derived growth factor, alpha          | 3,042  | 0,000<br>036 |

|              |                                                                 |        |              |
|--------------|-----------------------------------------------------------------|--------|--------------|
| Pecam1       | Platelet/endothelial cell adhesion molecule 1                   | 0,6192 | 0,028<br>404 |
| Pgf          | Placental growth factor                                         | 4,3268 | 0,000<br>951 |
| Plau         | Plasminogen activator, urokinase                                | 1,752  | 0,006<br>632 |
| Plg          | Plasminogen                                                     | 4,7774 | 0,001<br>024 |
| Ptgs1        | Prostaglandin-endoperoxide synthase 1                           | 3,5558 | 0,004<br>215 |
| Ptk2         | PTK2 protein tyrosine kinase 2                                  | 0,5124 | 0,000<br>853 |
| S1pr1        | Sphingosine-1-phosphate receptor 1                              | 1,0621 | 0,590<br>418 |
| Serpine<br>1 | Serine (or cysteine) peptidase inhibitor, clade E, member 1     | 3,9199 | 0,000<br>01  |
| Serpinf1     | Serine (or cysteine) peptidase inhibitor, clade F, member 1     | 1,8124 | 0,000<br>022 |
| Smad5        | MAD homolog 5 (Drosophila)                                      | 1,1689 | 0,287<br>074 |
| Sphk1        | Sphingosine kinase 1                                            | 3,2472 | 0,000<br>152 |
| Tbx1         | T-box 1                                                         | 4,3758 | 0,000<br>164 |
| Tek          | Endothelial-specific receptor tyrosine kinase                   | 4,0979 | 0,000<br>175 |
| Tgfa         | Transforming growth factor alpha                                | 4,829  | 0,000<br>015 |
| Tgfb1        | Transforming growth factor, beta 1                              | 0,9587 | 0,615<br>773 |
| Tgfb2        | Transforming growth factor, beta 2                              | 1,4701 | 0,003<br>948 |
| Tgfb3        | Transforming growth factor, beta 3                              | 3,5765 | 0,000<br>681 |
| Tgfbbr1      | Transforming growth factor, beta receptor I                     | 1,2546 | 0,015<br>422 |
| Thbs1        | Thrombospondin 1                                                | 2,1879 | 0,000<br>131 |
| Thbs2        | Thrombospondin 2                                                | 3,7471 | 0,000<br>77  |
| Tie1         | Tyrosine kinase with immunoglobulin-like and EGF-like domains 1 | 4,677  | 0,000<br>147 |
| Timp1        | Tissue inhibitor of metalloproteinase 1                         | 4,4609 | 0,001<br>06  |
| Timp2        | Tissue inhibitor of metalloproteinase 2                         | 1,2357 | 0,105<br>908 |
| Tnf          | Tumor necrosis factor                                           | 0,5302 | 0,001<br>272 |
| Tnfsf12      | Tumor necrosis factor (ligand) superfamily, member 12           | 2,1185 | 0,007<br>691 |
| Tymp         | Thymidine phosphorylase                                         | 4,2768 | 0,000<br>741 |
| Vegfa        | Vascular endothelial growth factor A                            | 0,8873 | 0,181<br>935 |
| Vegfb        | Vascular endothelial growth factor B                            | 2,00   | 0,053<br>742 |

|                  |                                                                             |        |              |
|------------------|-----------------------------------------------------------------------------|--------|--------------|
| Vegfc            | Vascular endothelial growth factor C                                        | 1,2618 | 0,110<br>815 |
| Vegf d -<br>Figf | C-fos induced growth factor or vascular endothelial growth factor D         | 5,4282 | 0,000<br>596 |
| Vegfr1 -<br>Flt1 | FMS-like tyrosine kinase 1 or Vascular endothelial growth factor receptor 1 | 4,7977 | 0,000<br>97  |

Total RNA was extracted from tumor lymph nodes of *Ibtk<sup>+/-</sup>E $\mu$ -myc* and *Ibtk<sup>+/-</sup>E $\mu$ -myc* mice, and analyzed for the expression of 84 genes by quantitative Real time PCR, using SABiosciences Angiogenesis RT<sup>2</sup> Profiler RT-PCR array. Genes were considered as “not detected” with Ct values ranging from 30 to 40 in *Ibtk<sup>+/-</sup>E $\mu$ -myc* cancer cells. Significant difference in gene expression was considered for at least 2-fold change in *Ibtk<sup>+/-</sup>E $\mu$ -Myc* versus *Ibtk<sup>+/-</sup>E $\mu$ -Myc* mice. Statistical analysis was performed by two-tails unpaired Student’s *t* test (*p* value < 0.05). Data are the mean of 3 independent experiments.

**Table S2.** Increased production of cytokines and chemokines in tumor lymph nodes of *Ibtk<sup>+/-</sup>E $\mu$ -myc* mice.

| Protein       | Fold change | <i>p</i> -value |
|---------------|-------------|-----------------|
| bFGF          | 0.77        | 0.36            |
| Eotaxin-1     | 0.94        | 0.9             |
| GCSF          | 0.78        | 0.71            |
| IGF-1         | 0.92        | 0.86            |
| IGF-2         | 0.92        | 0.85            |
| IFN-gamma     | 0.84        | 0.5             |
| IL-12 p40/p70 | 0.71        | 0.4             |
| IL-12 p70     | 1.11        | 0.8             |
| IL-17A        | 1.00        | 0.92            |
| IL-17B        | 1.23        | 0.5             |
| IL-17RB       | 0.86        | 0.67            |
| IL-17E        | 0.99        | 0.98            |
| IL-17F        | 0.90        | 0.58            |
| IL-6          | 0.97        | 0.95            |
| IL-6R         | 0.91        | 0.3             |
| KC            | 0.98        | 0.95            |
| LEPTIN        | 1.22        | 0.76            |
| LEPTIN R      | 0.90        | 0.83            |
| MCP-2         | 0.94        | 0.87            |
| M-CSF         | 1.03        | 0.97            |
| MMP-2         | 0.80        | 0.72            |
| PRO-MMP-9     | 5.27        | 0.0007          |
| RANTES        | 0.86        | 0.7             |
| TIMP-2        | 0.94        | 0.8             |
| TNF alpha     | 1.30        | 0.75            |
| VEGF          | 1.86        | 0.04            |
| VEGFR1        | 1.12        | 0.7             |
| VEGFR2        | 1.07        | 0.86            |

|        |      |       |
|--------|------|-------|
| VEGFR3 | 1.03 | 0.9   |
| VEGF-D | 1.75 | 0.015 |
| GM-CSF | 1.21 | 0.8   |

---

Whole cell extracts of tumor lymph nodes of *Ibtk<sup>+/-</sup>E $\mu$ -myc* and *Ibtk<sup>+/-</sup>E $\mu$ -myc* mice were analyzed by cytokines array (RayBiotech). Fold change of *Ibtk<sup>+/-</sup>E $\mu$ -myc* versus *Ibtk<sup>+/-</sup>E $\mu$ -myc* mice is reported. Statistically significant difference between *Ibtk<sup>+/-</sup>E $\mu$ -myc* and *Ibtk<sup>+/-</sup>E $\mu$ -myc* mice was evaluated by Student's *t* test (*p* value < 0.05). Data are the mean of at least 3 independent experiments.
